# Supplementary material for: Patchy striatonigral neurons modulate locomotor vigor in response to environmental valence
Source: eLife. 2025 Oct 1;14:RP106403. doi: 10.7554/eLife.106403 (PMC12488187; doi:10.7554/eLife.106403)
Supplement: Source data 1. [file elife-106403-data1.xlsx]

## Sheet: Fig1C
N defined as	Mean±SEM
one dorsal or ventral hemisection. (3-5 sections per mouse over common rostro-caudal spread. 3 mice per group)	Ctrl 12.03±0.9643; PA 5.154±0.5749
	Ctrl 21.11±1.357; PA 17.29±1.112

## Sheet: Fig1E
Group	PA
ID	L269	L271	L278	L280	L281	L316	L318	L320	L411	L451
% in dark	84.59	72.89	50.46	40.97	65.67	60.38	66	57.24	64.28	53.54
Group	Ctrl
ID	L253	L330	L340-female	L341-female	L342-female	L343-female	L452	L453	L480	L481	L482
% in dark	52.5	70.55	67.75	60.82	49.07	58.31	84.31	69.44	68.84	77.4	67.77

## Sheet: Fig1F
Fig1F	PA-L	Column3	Column4	Column5	Column6	Column7	Column8	Column9	Column10	Column11	Column12	Column13	Column14	Column15	Column16	Column17	Column18	Column19	Column20	Column21	Column22	Column23
avg. speed	9.33199	5.34737	7.62054	4.05913	10.7725	6.16831	8.96576	18.3812	7.7006	4.31663
	PA-D
avg. speed	7.71933	4.14616	5.89926	6.04709	5.8099	3.83703	4.30659	8.58705	6.02564	4.35676
	Ctrl-L
avg. speed	3.81063	6.60796	5.114	4.6262	6.71737	7.09816	6.7407	4.54458	6.53906	6.30279	8.00836
	Ctrl-D
avg. speed	3.59408	3.51989	2.78093	2.99473	5.35817	4.82789	1.95566	2.87546	3.78214	3.67647	5.13948

## Sheet: Fig1G
max speed	ctrl-all	PA-all
	22	33
	22	23
	23	29
	22	24
	26	32
	28	25
	19	27
	22	37
	24	25
	24	24
	26

## Sheet: Fig1H
cm/sec	Column2	Abl-Light	Column4	Column5	Column6	Column7	Column8	Column9	Column10	Column11	Column12	Column13	Column14	Abl-Dark	Column16	Column17	Column18	Column19	Column20	Column21	Column22	Column23	Column24	Column25	Column26	ctrl-Light	Column28	Column29	Column30	Column31	Column32	Column33	Column34	Column35	Column36	Column37	Column38	Column39	ctrl-Dark	Column41	Column42	Column43	Column44	Column45	Column46	Column47	Column48	Column49	Column50
	ID	L269	L271	L278	L280	L281	L316	L318	L320	L411	L451			L269	L271	L278	L280	L281	L316	L318	L320	L411	L451			L253	L330	L340	L341	L342	L343	L452	L453	L480	L481	L482			L253	L330	L340	L341	L342	L343	L452	L453	L480	L481	L482
1		13.3983	19.6281	7.73058	33.048	2.86062	13.8953	4.19274	2.03327	7.46187	24.227			12.7201	19.2926	12.8571	11.9181	14.0676	22.4597	14.1013	7.65858	13.1318	19.6571			20.0503	7.43329	17.2781	23.2856	10.6061	11.0505	9.5498	23.4029	10.5892	13.1514	5.1186			17.8678	17.6246	28.5541	34.3308	14.6558	19.0698	38.2844	30.3427	21.8727	25.0216	12.1481
2		17.296	19.2837	18.8672	27.1477	7.85149	20.407	11.8273	4.52865	15.0327	23.7182			19.6439	26.5733	20.1993	18.4591	22.7284	27.6235	24.6835	13.8264	20.9745	22.7802			30.7222	18.1067	23.432	21.5096	21.0007	20.7822	13.3697	23.9722	19.0436	21.8362	16.6667			28.2962	28.4283	34.0462	30.0326	26.4485	26.5698	33.2208	30.7711	30.3481	27.31	21.2346
3		9.50061	11.0193	11.8638	6.6952	7.54717	11.8605	11.0763	4.66728	11.0566	11.82			10.1088	13.1833	12.7907	11.0754	12.3655	11.6047	15.8987	9.93861	11.9854	13.2884			12.7201	13.3418	12.8402	12.3335	12.1917	10.8231	11.1869	10.8159	12.8096	11.0835	11.5481			14.3142	15.0012	12.2722	8.92274	12.0314	11.8605	8.85624	10.6854	12.533	12.3921	11.9506
4		5.84653	8.67769	6.9269	4.24946	7.54717	7.5	10.4506	4.43623	9.31373	7.04501			7.47774	7.69407	7.9402	8.22632	7.83479	7.0794	10.557	7.01549	7.63418	8.66503			7.61768	10.0381	8.22485	6.01875	7.50529	7.68531	8.73124	6.13536	8.19812	8.35401	8.55181			9.13318	8.53804	6.41555	4.679	6.30539	5.98837	4.8054	5.40219	6.79472	6.47668	8.83951
5		3.77588	6.19835	6.19977	2.69031	7.24285	5.34884	6.57071	3.55823	6.64488	5.36204			5.1632	5.02986	6.77741	6.34029	5.6821	4.46974	6.37975	6.34317	5.18499	6.42988			4.49156	6.16264	5.38462	4.88407	5.21494	5.27513	6.54843	4.87034	5.55081	5.95533	6.2422			5.94487	5.69998	3.25638	3.40044	4.77164	4.59302	2.46227	4.06949	4.0096	3.86442	7.03704
6		4.99391	5.71625	6.31458	3.14888	6.87766	5.34884	6.38298	3.92791	6.10022	4.18787			4.64886	5.69591	5.68106	6.66132	6.20776	4.38645	6.3038	4.94008	4.66389	5.20514			4.85088	5.71792	5.73964	5.67341	4.96829	5.5025	8.32196	4.55408	5.55081	5.29363	5.43071			5.11458	5.36609	2.89186	3.07399	4.49898	4.21512	2.66084	3.85531	4.46579	4.27461	6.14815
7		2.55786	2.68595	3.75048	1.95659	4.13877	3.19767	3.50438	3.04991	4.13943	2.58317			3.28388	3.19247	3.52159	4.13323	3.07885	3.05386	3.64557	3.62467	3.62168	3.03123			2.44341	3.81194	2.66272	2.3187	3.13601	2.86494	4.2292	2.27704	3.67208	3.14309	3.99501			2.19196	3.17195	1.62819	1.76823	2.4199	3.1686	1.64813	1.73727	2.28091	2.37478	3.97531
8		2.31425	3.0303	3.67394	1.6203	5.29519	3.54651	3.62954	2.81885	3.97603	2.27006			2.78932	2.22784	3.22259	3.29053	2.8035	3.10938	2.35443	4.00468	3.77801	3.1537			2.15595	3.74841	3.13609	2.56537	2.85412	3.18327	4.91132	2.34029	3.41588	3.14309	3.80774			2.95583	2.52802	1.45808	1.68662	3.2379	2.52907	1.35028	1.73727	2.52101	2.48273	4.09877
9		2.55786	2.13499	3.02334	1.58973	4.07791	2.96512	2.81602	2.21811	2.39651	2.03523			3.02671	2.06706	3.02326	3.85233	2.42804	2.74847	2.05063	3.6539	2.52736	2.38824			1.61696	3.24015	1.6568	2.26936	2.67794	3.68349	4.7749	2.65655	3.84287	2.89495	2.99625			2.62371	2.19413	1.21507	1.06094	2.38582	2.41279	1.33042	1.85626	1.56062	1.85665	3.67901
10		1.58343	1.65289	2.06659	2.01773	3.59099	1.74419	2.75344	1.84843	2.72331	1.6047			2.07715	1.83739	2.65781	3.29053	2.42804	1.63798	1.49367	2.63081	2.39708	1.74525			1.36543	3.17662	1.36095	2.1707	1.7618	1.90996	2.45566	2.40354	2.22032	1.81969	2.05993			2.12554	1.45481	0.850547	1.22416	2.01091	1.8314	0.794281	1.09472	1.2485	1.57599	3.08642

## Sheet: Fig1I
frame	Column2	ablt-Trans into Light	Column4	Column5	Column6	Column7	Column8	Column9	Column10	Column11	Column12	Column13	Column14	Column15	ablt- Trans into Dark	Column17	Column18	Column19	Column20	Column21	Column22	Column23	Column24	Column25	Column26	Column27	Column28	ctrl- Trans into Light	Column30	Column31	Column32	Column33	Column34	Column35	Column36	Column37	Column38	Column39	Column40	Column41	ctrl- Trans into Dark	Column43	Column44	Column45	Column46	Column47	Column48	Column49	Column50
		L269	L271	L278	L280	L281	L316	L318	L320	L411	L451				L269	L271	L278	L280	L281	L316	L318	L320	L411	L451				L253	L330	L340-f	L341-f	L342-f	L343-f	L452	L453	L480	L481	L482			L253	L330	L340-f	L341-f	L342-f	L343-f	L452	L453	L480
-2		14.03	4.4	9.14	6.52	8.96	5.08	5.03	12.23	4.47	4.31				6.38	2.3	5.94	8.73	8.6	5.86	4.36	14.88	7.34	4.26				5.54	3.75	6.49	4.24	6.34	5.63	2.92	6.27	4.61	8.04	6.56			3.79	4.02	5.32	3.25	7.09	7.08	6.78	6.7	4.08
-1.9		13.71	4.49	7.5	7.71	9.79	5.1	5.63	12.82	4.65	3.97				6.8	1.84	5.35	7.72	8.55	6.92	4.29	14.61	7.43	4.65				5.59	4.26	5.98	3.38	6.23	6.04	3.7	6.24	4.82	7.65	6.1			4.39	4.68	5.6	3.99	8.25	7.28	4.78	5.23	5.12
-1.8		13.97	6.38	7.62	6.05	9.69	5.02	5.47	12.96	3.93	3.54				8.94	4.67	7.22	9.42	10.4	9.1	4.69	16.18	7.08	4.77				4.23	3.57	3.73	4.67	6.44	6.71	3.57	6.05	4.93	7.25	6.51			4.8	4.57	6.17	4.12	8.8	8.71	5.47	5.9	5.44
-1.7		10.79	5.79	8.36	5.4	9.82	4.08	4.95	12.73	4.43	3.13				12.75	4.84	8.15	8.82	9.86	9.11	6.5	14.53	8.37	5.16				4.01	4.15	3.6	5.34	6.37	6.09	1.67	6.03	6.77	6.56	5.56			5.41	5.08	7.63	2.99	8.75	8.34	6.72	6.24	6.05
-1.6		9.74	6.75	7.65	7.9	7.91	4.19	5.12	12.08	5.47	4.39				14.08	5.33	9.05	8.76	9.76	8.83	6.47	15.78	8.6	6.09				5.49	5.07	3.64	2.9	5.25	6.22	1.01	4.75	7.82	5.76	5.91			4.99	4.87	9.34	3.93	9.25	8.32	6.65	4.79	5.97
-1.5		9.32	6.65	7.8	7.51	8.07	5.08	4.88	13.04	5.82	4.66				16.04	5.71	7.01	7.84	9.07	9.7	6.26	16.57	9.45	6.84				5.23	4.95	3.54	4.44	5.64	6.27	1.94	5.15	7	6.5	5.83			5.02	6.27	7.66	3.39	9.63	10.06	7.16	6.72	6.19
-1.4		8.54	6.78	7.03	8.74	7.24	4.96	5.17	12.55	6.34	4.95				18.12	7.93	7.65	8.67	7.71	9.48	7.6	15.31	9.68	7.29				4.83	3.45	4.75	4.77	6.35	6.03	2.51	5.97	7.45	5.66	5.9			4.64	6.48	6.15	4.3	8.93	10.24	6.69	8.73	5.16
-1.3		6.72	7.63	8.12	8.21	7.36	4.03	4.73	12.7	6.41	5.27				18.06	10.16	9.24	8.24	9.35	7.78	10.53	15.1	9.72	5.46				3.79	3.99	5.28	5.62	5.95	7.14	2.79	7.78	8.55	5.45	5.43			6.78	6.61	5.96	3.62	10.23	9.23	6.87	7.27	5.16
-1.2		7.92	8.07	7.02	7.72	7.37	5.15	4.08	11.87	7.59	6.16				18.22	11.15	7.72	9.59	9.21	8.13	12.33	14.44	14.34	7.84				4.5	3.65	6.45	6.98	5.72	6.13	4.03	7.27	6.87	5.21	5.77			7.71	7.12	4.09	4.03	10.57	9.8	7.96	7.8	5.73
-1.1		8.69	7	7.38	7.15	6.9	4.69	5.43	12.06	7.18	7.67				19.53	12.26	9.64	8.11	7.63	8.47	13.05	15.42	13.41	6.88				3.79	3.83	7.2	8.75	6.34	5.41	4.53	6.92	8.19	6.37	7.64			8.19	6.79	5.48	5.23	10.75	12.08	8.2	8.47	6.14
-1		9.83	6.95	6.93	7.64	6.69	5.7	5.3	10.65	8.71	8.13				21.93	15.23	10.51	9.17	8.71	9.03	13.23	16.49	13.36	7.42				3.3	4.8	6.32	10.89	6.75	6.42	5.48	7.16	7.59	5.85	7.2			7.13	8.18	9.2	3.17	9.2	10.33	7.98	11.47	5.18
-0.9		10.11	7.49	7.77	8.77	6.63	5.57	5.83	10.86	8.39	7.38				19.38	16.63	9.75	9.51	11.26	8.66	13.66	16.61	14.31	6.63				4.08	4.29	8.23	12.07	7.94	7.83	5.64	7.65	7.71	7.48	6.18			7.37	8.44	10.66	3.82	9.99	11.58	6.11	11.05	4.87
-0.8		11.86	8.34	9.7	8.57	6.32	6.27	6.56	10.66	7.64	7.03				19.31	16.67	10.17	8.74	13.54	7.97	13.02	16.13	14.79	8.31				2.64	6.25	8.51	12.74	7.67	9.49	5.9	8.76	5.39	9.06	6.93			7.98	10.5	9.13	3.63	8.34	12.05	4.07	9.81	4.67
-0.7		13.99	7.63	11.13	7.58	6.24	6.3	7.03	9.96	7.33	8.37				21.45	19.49	10.76	10.06	14.44	8.32	11.49	16.24	13.05	7.56				3.95	7.66	8.51	10.81	8.34	9.25	5.22	7.9	4.05	10.2	7.55			10.17	11.4	9.23	3.39	7.74	12.18	6.17	11.55	4.4
-0.6		14.61	7.75	10.73	7.5	6.89	7.42	7.84	10.83	8.62	9.4				20.44	20.38	11.29	8.85	17.68	7.31	10.52	13.12	14.53	7.86				4.65	10.31	10.35	9.69	8.27	10.07	4.84	7.52	4.29	6.33	6.3			11.02	11.25	8.78	5.39	8.14	11.44	7.12	13.07	4.64
-0.5		16.02	7.91	10.22	7.23	9.19	7.3	9.12	11.8	8.5	9.02				19.34	16.74	13.48	10.84	17.47	8.58	10.16	14.09	14.63	10.42				5.16	12.09	9.53	10.07	9.49	10.73	7.32	9.68	4.25	7.68	7.06			10.06	13.35	8.88	4.92	9.65	10.43	7.38	8.88	6.62
-0.4		19.37	5.05	8.52	9.18	10.16	5.8	8.46	14.24	8.32	9.96				19.43	12.9	14.27	12.06	18.79	8.28	10.75	13.5	14.3	10.32				6.04	12.91	8.11	9.85	8.54	12.54	9.19	10.39	3.45	7.11	7.83			10.73	12.69	10.38	6.13	9.17	13.03	10.07	9.92	7.91
-0.3		17.77	4.97	8.59	10.14	10.36	8.64	10.71	14.07	9.66	9.89				19.55	15.14	14.74	12.49	18.82	10.46	11	14.36	15.15	14.32				5.95	13.16	10.54	11.11	9.59	12.55	10.08	10.53	5.89	10.7	8.19			13.45	12.02	11.43	8.85	10.99	11.97	12.2	11.3	8.94
-0.2		18.88	7.08	11.84	11.55	14.73	8.3	10.79	15.44	10.47	13.03				22.47	19.65	15.49	14	19.63	11.66	12.15	16	14.68	15.05				11.19	11.49	12.2	9.67	12.14	14.32	11.99	13.79	8.8	13.12	11.42			15.27	15.01	12.38	12.31	12.08	15.95	12.8	12.94	11.13
-0.1		17.2	7.97	14.08	12.82	16.44	9.29	12.46	19.15	11.88	12.51				28.52	21.93	17.98	13.54	21.32	12.79	12.48	19.25	16.05	15.24				11.97	14.94	12.92	11.55	14.52	14.08	11.87	14.95	11.65	11.72	11.22			16.5	14.83	15.67	13.92	14.03	16.02	16.36	13.7	11.06
0		18.02	12.21	16.7	14.21	18.59	13.39	16.62	21.63	15.49	16.98				24.67	16.64	16.4	11.18	20.58	11.44	12.4	19.28	14.02	13.71				15.84	20.12	14.65	14.71	17.67	17.16	13.81	17.78	17.2	17.16	13.76			13.18	13.94	14.14	10.21	13.86	15.42	11.43	12.39	10.42
0.1		13.27	9.81	14.16	13.2	17.19	11.72	14.95	19.36	13.72	15.31				25.96	18.28	12.87	10.05	16.08	9.09	8.99	16.72	11.44	12.01				14.45	17.88	12.94	14.52	15.29	13.46	11.93	16.16	12.65	14.65	10.98			11.72	10.54	13.1	11.69	9.88	14.25	10.26	12.93	10.52
0.2		10.77	8.03	12.11	8.98	15.77	9.62	13.55	17.58	12.38	11.54				27.29	17.21	12.92	7.8	16.37	9.17	7.87	14.12	10.33	11.54				13.61	15	9.22	10.54	13.44	12.54	6.31	12.3	10.68	12.77	9.79			10.59	9.36	8.3	11.76	11.69	12.51	8.94	12.1	9.44
0.3		12.05	10.18	11.96	10.71	15.13	9.09	13.84	17.45	12.9	10.43				23.56	18.29	13.99	9.62	13.81	8.01	8.65	13.84	9.73	10.04				12.48	15.11	7.95	10.6	15.07	12.42	8.29	10.97	9.1	15.96	11.53			8.27	9.32	10.85	11.06	12.46	10.91	6.63	13.66	8.75
0.4		13.22	12.46	11.2	9	13.47	9.91	11.01	15.74	8.41	9.46				16.35	16.13	13.14	8.89	11.12	6.84	8.44	13.58	7.87	10.68				12.2	12.84	8.57	9.93	11.19	11.84	8.74	12.3	7.08	13.19	9.53			7.52	7.77	8.9	9.07	11.73	9.42	3.98	10.92	8.04
0.5		13.02	13.29	9.46	10.42	13.21	7.78	11.45	14.7	8.21	9.34				8.4	11.97	9.39	9.34	8.7	6.99	6.39	12.63	7.52	7.77				9.21	11.65	9.66	9.73	11.51	11.77	7.5	8.06	5.5	11.73	9.64			7.5	7.67	6.59	7.88	10.71	8.78	2.67	11.07	5.82
0.6		11.21	15.35	11.16	10.24	10.8	7.57	12.18	14.11	8.92	8.64				5.82	8.18	6.82	9.53	8.06	6.83	6	11.3	7.08	7.47				7.39	9.52	8.6	9.03	11.32	11.13	5.73	10.5	6.76	14.18	8.67			7.23	5.61	5.24	5.63	9.25	7.36	2.41	9.34	4.53
0.7		9.95	14.18	11.71	8.23	9.68	8.3	12.38	14.54	9.7	9				4.06	7.69	6.49	8.3	7.17	6.42	5.84	9.2	6.33	6.98				7.69	8.31	7.13	8.03	10.7	9.75	5.61	8.35	6.31	12.66	9.26			6.52	4.64	4.69	4.31	8.99	6.9	1.65	6.52	4.46
0.8		10.04	13.8	11.76	8.14	9	8.13	11.98	14.93	9.07	8.31				3.28	5.96	6.35	7.13	6.79	6.91	6.75	8.3	7.3	6.62				6.8	9.49	8.34	8.14	11.22	9.53	6.54	5.59	6.6	11.47	10.33			7.02	4.09	5.19	5.1	8.55	6.97	1.36	6.12	4.11
0.9		12.96	11.05	11.38	8.63	9.57	7.86	13.35	15.21	10.23	7.52				3.87	4.94	5.46	7.55	7.05	6.14	5.17	8.54	7.33	5.86				7.49	8.67	6.21	8.25	8.72	7.88	5.95	4.83	7.3	12.12	9.84			6.55	4.33	3.77	5.84	8.17	7.57	1.43	7.16	4.1
1		17.45	8.3	9.52	9.6	8.76	5	14.06	14.94	9.69	7.23				4.45	3.95	6.52	6.91	6.37	5.26	5.52	9.42	5.66	7.25				7.35	6.09	5.66	7.04	7.53	7.31	6.69	5.35	8.11	12.17	10.93			6.66	4.82	4.29	5.33	7.47	7.54	1.34	9.17	4.97
1.1		19.07	7.33	9.02	10.36	10.49	6.75	14.57	14.07	9.45	8.36				5.05	4.4	8.01	6.14	5.5	6.41	5.55	9.81	4.56	6.45				7.25	5.59	4.13	5.8	7.1	7.54	7.12	5.79	8.12	12.36	10.24			4.38	4.87	4.87	5.89	6.23	6.23	1.35	8.03	5.08
1.2		20.67	9.69	10.7	8.43	10.69	6.98	12.95	15.62	9.79	9.25				6.21	5.1	9.15	5.32	4.59	5.8	5.44	9.21	4.57	6.5				5.97	6.1	5.06	4.68	7.4	8.31	7.97	5.03	8.98	11.23	9.75			4.15	5.66	4.45	4.05	5.74	6.22	1.15	8.6	5.09
1.3		21.68	8.5	10.73	7.36	10.89	7.56	11.93	16.02	9.37	11.01				7.6	4.1	8.76	4.98	5.6	5.53	5.59	10.13	2.94	6.04				7.52	5.35	6.35	6.48	6.38	7.73	8.5	6.08	8.04	9.01	9.27			3.88	6.15	4.5	4.48	5.67	6.85	1.24	8.5	4.64
1.4		21.74	9.26	12.47	6	10.97	8.29	12.43	15.56	8.57	12				7.17	3.26	7.39	5.28	6.28	5.19	5.25	11.33	3.25	5.99				6.92	4.79	7.37	5.42	6.29	6.96	6.1	7	9.78	9.83	8.49			3.38	5.23	4.24	5.32	7.15	6.14	1.37	9.46	3.54
1.5		21.92	10.09	12.34	8.56	12.22	6.69	10.86	15.48	8.99	11.16				8.48	4.01	8.67	6.26	6.96	4.64	4.68	11.59	3.47	4.95				7.48	4.71	7.7	7.4	4.3	7.42	6.26	5.16	7.82	7.63	7.65			3.22	4.17	4.82	5.08	6.61	6.68	1.05	8.95	4.69
1.6		21.76	8.9	11.25	9.36	12.17	7.17	9.65	15.49	8.93	9.33				8.76	3.59	8.63	7.51	6.37	4.52	3.65	13.71	3.6	5.74				5.56	5.37	10.3	5.2	4.58	5.73	7.75	4.77	6.6	4.62	6.6			2.28	4.31	5.88	6.11	7.37	6.17	1.39	9.75	4.21
1.7		13.51	6.79	9.84	10.53	10.14	6.91	7.84	14.07	9.07	5.9				10.67	3.76	9.14	6.03	6.71	4.4	4.63	12.2	3.92	5.2				4.7	5.29	7.62	4.52	4.65	4.8	7.11	5.89	7.46	5.23	7.21			1.78	4.4	6.22	5.58	6.87	7.16	1.51	8.83	2.5
1.8		9.58	6.73	6.99	10.14	8.24	8.58	6.58	14.65	8.33	5.62				11.88	4.31	8.12	6.92	7.5	5.37	5.06	11.73	3.93	5.84				3.72	2.98	6.55	4.26	5.9	4.57	7.23	6.06	6.91	4.82	7.48			2.61	4.45	5.95	5.34	7.84	6.75	1.24	8.25	3.23
1.9		10.55	6.49	7.39	9.84	7	9.89	5.76	14.52	8.02	5.42				13.37	6.74	8.81	6.43	7.89	5.41	5.73	12.13	4.72	6.88				3.76	3.57	6.9	3.35	5.69	4.08	6.53	7.06	6.45	2.37	7.2			2.92	4.55	5.35	6.26	9.92	6.28	1.3	8	3.31
2		9.74	6.35	6.3	9.56	8.03	8.82	5.67	13.73	8.32	4.85				12.91	8.23	9.2	7.4	8.07	3.59	6.25	11.2	4.43	7.42				4.52	4.83	6.3	4.61	5.83	3.96	6.29	4.62	6.97	3.56	7.38			3.75	4.96	6.14	4.53	10.84	6.84	0.55	6.4	3.53
[truncated: 3 more columns]

## Sheet: Fig1J
Column1	Column2	Column3	Column4	Column5	Column6	Column7	Column8	Column9	Column10	Column11	Column12	Column13	Column14	Column15	Column16	Column17	Column18	Column19	Column20	Column21	Column22	Column23
glme_ablctrlOnlyapp = fitglme(ablCtrlONLY_App, 'Vel ~ 1 + time + into + (1|mouse)')							>> glme_SAOnlyapp = fitglme(SAONLY_App, 'Vel ~ 1 + time + into + (1|mouse)')									>> glme_ablctrlOnlyRet = fitglme(ablCtrlONLY_Ret, 'Vel ~ 1 + time + into + (1|mouse)')						>> glme_SAOnlyRet = fitglme(SAONLY_Ret, 'Vel ~ 1 + time + into + (1|mouse)')
Model information:																Model information:						Model information:
Number of observations 330							glme_SAOnlyapp =									Number of observations 330						Number of observations 300
Fixed effects coefficients 3							Model information:									Fixed effects coefficients 3						Fixed effects coefficients 3
Random effects coefficients 11							Number of observations 300									Random effects coefficients 11						Random effects coefficients 10
Covariance parameters 2							Fixed effects coefficients 3									Covariance parameters 2						Covariance parameters 2
Distribution Normal							Random effects coefficients 10									Distribution Normal						Distribution Normal
Link Identity							Covariance parameters 2									Link Identity						Link Identity
FitMethod MPL							Distribution Normal									FitMethod MPL						FitMethod MPL
							Link Identity
Formula:							FitMethod MPL									Formula:						Formula:
Vel ~ 1 + time + into + (1 | mouse)																Vel ~ 1 + time + into + (1 | mouse)						Vel ~ 1 + time + into + (1 | mouse)
							Formula:
Model fit statistics:							Vel ~ 1 + time + into + (1 | mouse)									Model fit statistics:						Model fit statistics:
AIC BIC LogLikelihood Deviance																AIC BIC LogLikelihood Deviance						AIC BIC LogLikelihood Deviance
1371 1390 -680.52 1361							Model fit statistics:									1318 1337 -654 1308						1364.5 1383.1 -677.27 1354.5
							AIC BIC LogLikelihood Deviance
Fixed effects coefficients (95% CIs):							1375.9 1394.4 -682.95 1365.9									Fixed effects coefficients (95% CIs):						Fixed effects coefficients (95% CIs):
Name Estimate SE tStat DF pValue Lower Upper																Name Estimate SE tStat DF pValue Lower Upper						Name Estimate SE tStat DF pValue Lower Upper
{'(Intercept)'} 10.783 0.46569 23.155 327 6.6595e-71 9.8671 11.699							Fixed effects coefficients (95% CIs):									{'(Intercept)' } 8.0155 0.46089 17.391 327 1.9935e-48 7.1088 8.9222						{'(Intercept)' } 7.4103 0.72731 10.189 297 4.1961e-21 5.979 8.8416
{'time' } 2.6022 0.23279 11.178 327 8.7138e-25 2.1443 3.0602							Name Estimate SE tStat DF pValue Lower Upper									{'time' } -1.8449 0.21387 -8.6264 327 2.7901e-16 -2.2656 -1.4242						{'time' } -0.55393 0.29341 -1.8879 297 0.060011 -1.1313 0.02349
{'into_Light' } -1.3655 0.20115 -6.7885 327 5.3436e-11 -1.7612 -0.9698							{'(Intercept)'} 14.291 0.86746 16.474 297 9.1627e-44 12.584 15.998									{'into_'Light''} 1.442 0.1848 7.8029 327 8.226e-14 1.0784 1.8056						{'into_'Light''} 3.7799 0.25353 14.909 297 6.5387e-38 3.2809 4.2788
							{'time' } 2.9415 0.2968 9.9108 297 3.4379e-20 2.3574 3.5256
Random effects covariance parameters:							{'into_Light' } -2.8423 0.25646 -11.083 297 4.048e-24 -3.347 -2.3376									Random effects covariance parameters:						Random effects covariance parameters:
Group: mouse (11 Levels)																Group: mouse (11 Levels)						Group: mouse (10 Levels)
Name1 Name2 Type Estimate							Random effects covariance parameters:									Name1 Name2 Type Estimate						Name1 Name2 Type Estimate
{'(Intercept)'} {'(Intercept)'} {'std'} 1.075							Group: mouse (10 Levels)									{'(Intercept)'} {'(Intercept)'} {'std'} 1.1395						{'(Intercept)'} {'(Intercept)'} {'std'} 1.8745
							Name1 Name2 Type Estimate
Group: Error							{'(Intercept)'} {'(Intercept)'} {'std'} 2.389									Group: Error						Group: Error
Name Estimate																Name Estimate						Name Estimate
{'sqrt(Dispersion)'} 1.8271							Group: Error									{'sqrt(Dispersion)'} 1.6786						{'sqrt(Dispersion)'} 2.1956
							Name Estimate
							{'sqrt(Dispersion)'} 2.221

## Sheet: Fig1L
Column1	Column2	Column3	Column4	Column5	Column6	Column7	Column8	Column9	Column10	Column11	Column12	Column13	Column14	Column15	Column16	Column17	Column18	Column19	Column20	Column21	Column22	Column23	Column24	Column25	Column26	Column27	Column28	Column29	Column30	Column31	Column32	Column33	Column34	Column35
Ctrl.LL									Ctrl.DD									Abl.LL									Abl.DD
L253	L320	L330	L452	L453	L480	L481	L482		L253	L320	L330	L452	L453	L480	L481	L482		L253	L320	L330	L452	L453	L480	L481	L482		L253	L320	L330	L452	L453	L480	L481	L482
5.0211	17.4584	5.44092	2.28941		3.98208	3.96699	6.66976		3.56918	11.1369	5.0901		3.22259		5.09084	4.67446		8.99317	6.00533	4.21984	4.89691	5.92999					17.4251	3.86299	5.85761	3.70805	5.6925	5.61194

## Sheet: Fig1M
Column1	LL	Column3	Column4	Column5	Column6	Column7	Column8	Column9	Column10	DD	Column12	Column13	Column14	Column15	Column16	Column17	Column18
Ctrl	25	43	26	26	28	18	22			21	37	24	27	25	21
PA	37	29	24	27	24					45	28	25	20	23	20

## Sheet: Fig1N
cm/sec	Ctrl_LLboth	Column3	Column4	Column5	Column6	Column7	Column8	Column9	Column10	Column11	Column12	Ctrl_Ddboth	Column14	Column15	Column16	Column17	Column18	Column19	Column20	Column21	Column22	Column23	Casp3_LLboth	Column25	Column26	Column27	Column28	Column29	Column30	Column31	Column32	Column33	Column34	Casp3_DDboth	Column36	Column37	Column38	Column39	Column40	Column41	Column42	Column43	Column44	Column45
1	11.4803	1.2425	12.247	29.6806	15.9717	20.7922	9.11802					16.5943	5.88341	13.4307	22.3262	15.8553	18.756						11.5749	10.3381	17.0268	14.854	10.7786							3.12344	17.7374	17.6219	20.4181	17.2345	25.3169
2	24.1064	4.68991	22.1443	39.1982	28.9459	30.724	18.1155					28.6914	11.8635	23.5166	23.2361	20.6253	21.7781						17.4911	24.6655	23.0852	23.3115	19.5537							7.44148	25.724	23.2524	26.7775	23.4263	27.2348
3	13.8784	4.53393	13.5009	9.47438	14.9786	11.3434	11.2528					14.065	8.86366	13.6341	9.97369	10.3608	12.8728						8.94161	13.1676	10.5211	12.5148	11.1042							5.59504	11.4447	11.6483	13.1203	11.8445	10.6493
4	8.79609	3.69345	8.57843	4.39794	7.88008	6.21889	7.09766					8.43289	6.21647	8.36646	5.90097	6.92418	7.40411						5.60774	7.58776	7.51871	7.97492	7.80185							4.20929	6.63969	8.14156	7.79859	7.0581	6.56036
5	6.85148	3.77975	5.92317	2.9994	5.88589	4.35709	5.83749					5.03217	5.30681	5.74486	4.15946	5.8305	5.52942						4.73174	6.54208	6.02499	6.6768	6.13252							3.53019	4.89474	5.49246	5.83498	5.5475	4.46672
6	6.96489	5.03109	5.8217	3.05485	4.71264	3.9075	6.57389					5.56224	5.49119	6.13145	5.04402	5.41569	5.76967						4.79117	5.78306	5.63562	5.97533	5.80283							4.16824	4.99479	5.05544	4.87704	4.90027	3.89124
7	3.60422	3.5573	3.13726	1.67665	3.22449	2.31336	3.84321					3.19977	3.62395	3.27883	3.15667	3.85054	3.39967						3.13864	3.5368	3.6302	3.52474	4.11765							2.40072	2.63434	2.89171	3.23669	3.18447	2.48006
8	3.49173	3.73231	3.0946	1.6212	2.56075	2.22323	4.34267					2.19533	3.64968	3.03938	2.91238	3.03312	3.06253						2.73693	3.15255	2.87429	3.29452	4.01031							2.69734	2.53362	2.74266	2.74367	3.27351	1.71923
9	2.57843	3.12795	2.92248	1.38141	2.30213	1.7227	3.63621					2.29838	3.1286	2.95273	3.10415	2.32462	2.36515						2.34584	2.32047	3.32307	2.61164	3.32949							2.32587	2.40839	2.40163	2.04454	3.10499	2.0073
10	2.02917	2.67876	1.9573	0.938975	1.65784	1.34922	3.07099					1.95606	2.20973	1.98563	2.32317	2.1512	2.26341						2.29203	2.099	2.07624	1.98771	2.58273							2.40786	1.90782	2.25315	1.52321	2.56821	1.54949

[truncated: 87 more sheets: Fig1O, Fig1P, Fig2E, Fig2F, Fig2G, Fig2H, Fig2I, Fig2J, Fig2K, Fig2L, Fig2M, Fig3A, Fig3B, Fig3C, Fig3D, Fig3E, Fig3F, Fig3G, Fig4C_GPe, Fig4C_GPi …]
